# Supplementary material for: PM Dimensional Characterization in an Urban Mediterranean Area: Case Studies on the Separation between Fine and Coarse Atmospheric Aerosol
Source: MDPI journal article supplement (doi:10.3390/atmos13020227), 2022-01-29
Supplement: s1 [file s1]

# Supplementary Materials: PM Dimensional Characterization in an Urban Mediterranean Area: Case Studies on the Separation between Fine and Coarse Atmospheric Aerosol

Maurizio Manigrasso <sup>1,\*</sup>, Maria Eleonora Soggiu <sup>2</sup>, Gaetano Settimo <sup>2</sup>, Marco Inglessis <sup>2</sup>, Carmela Protano <sup>3</sup>, Matteo Vitali <sup>3</sup> and Pasquale Avino <sup>4</sup>

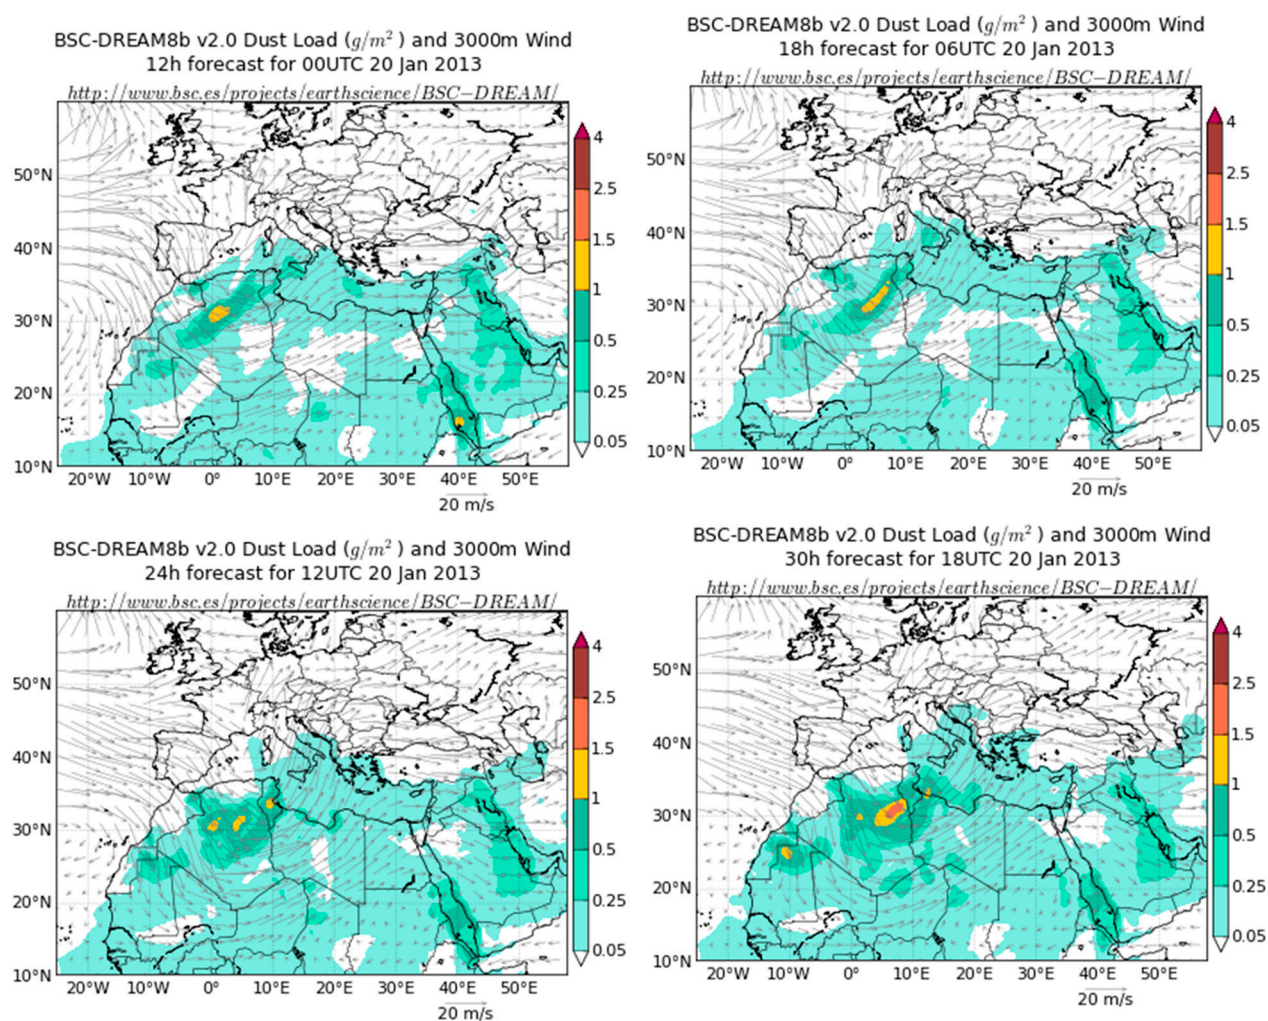

**Figure S1.** DREAM dust loading and wind field at 3000 m height in the Mediterranean area on 20th January 2013.

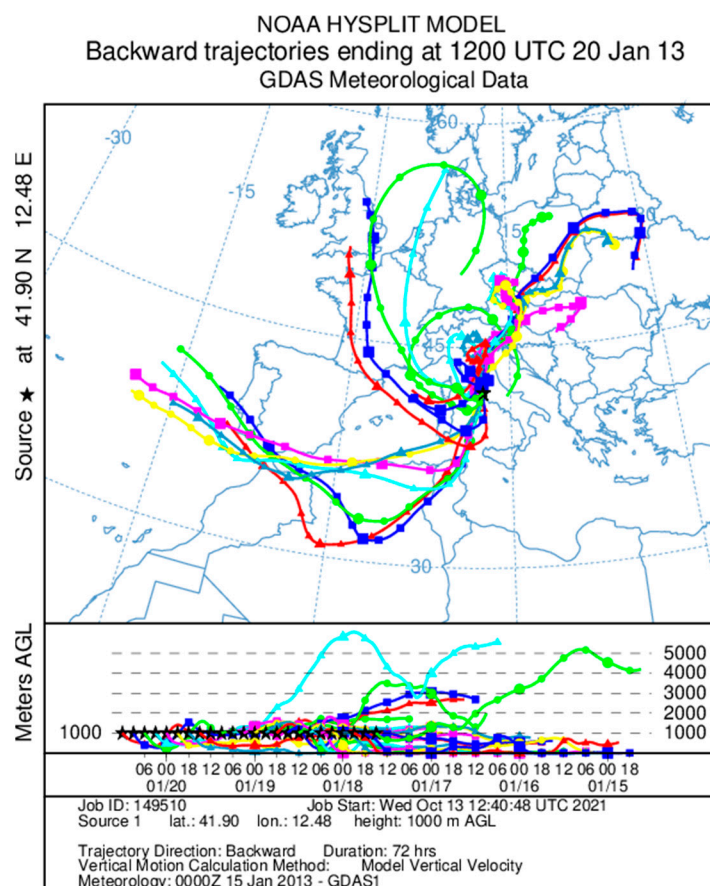

**Figure S2.** NOAA HYSPLIT 72 h backward air trajectories passing over Rome, 1000 above ground level, on 20th January 2013.



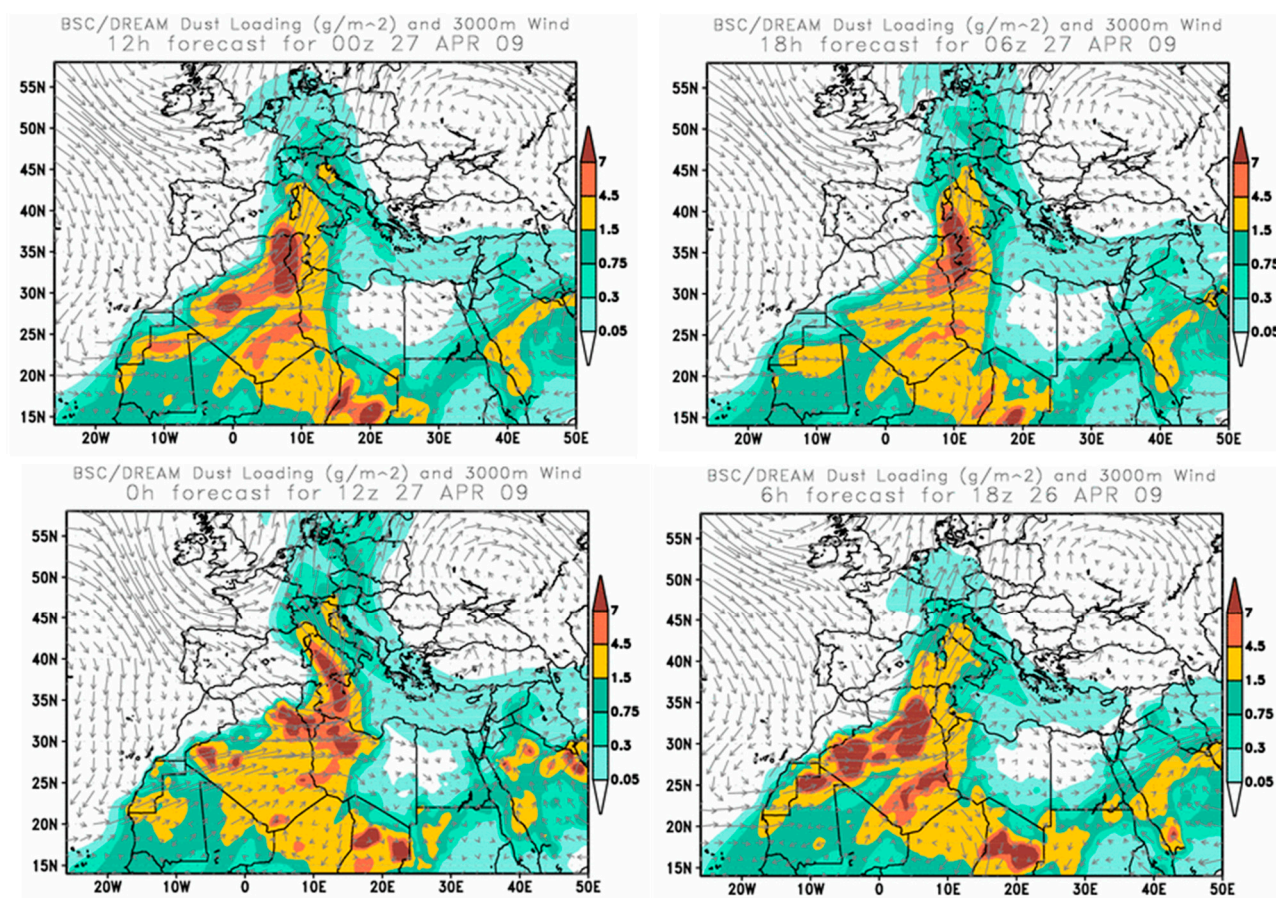

Figure S3. DREAM dust loading and wind field at 3000 m height in the Mediterranean area on 26th April 2009.

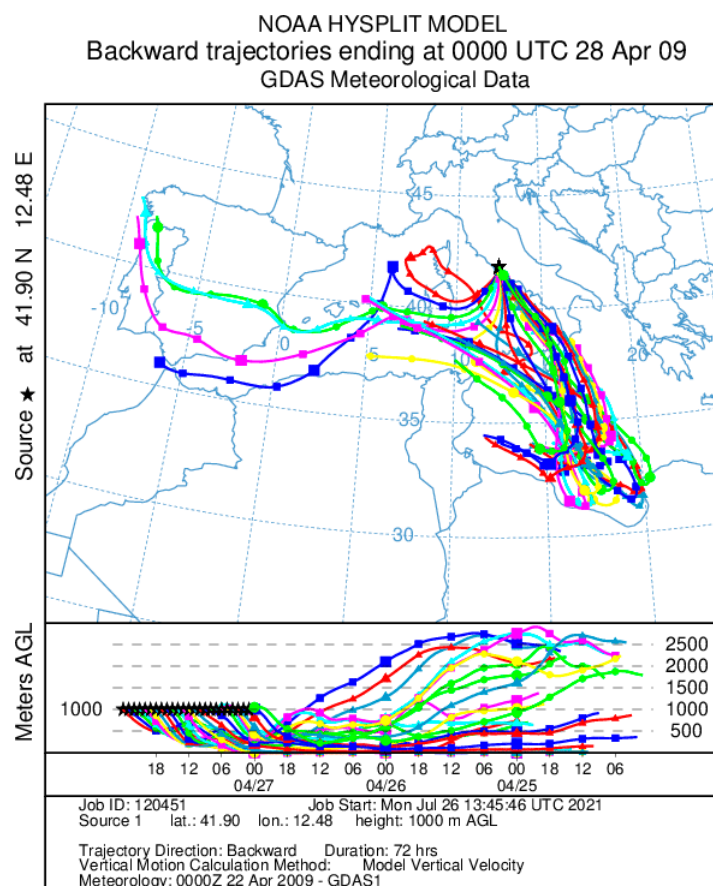

**Figure S4.** NOAA HYSPLIT 72 h backward air trajectories passing over Rome, 1000 above ground level, on 28th April 2009.

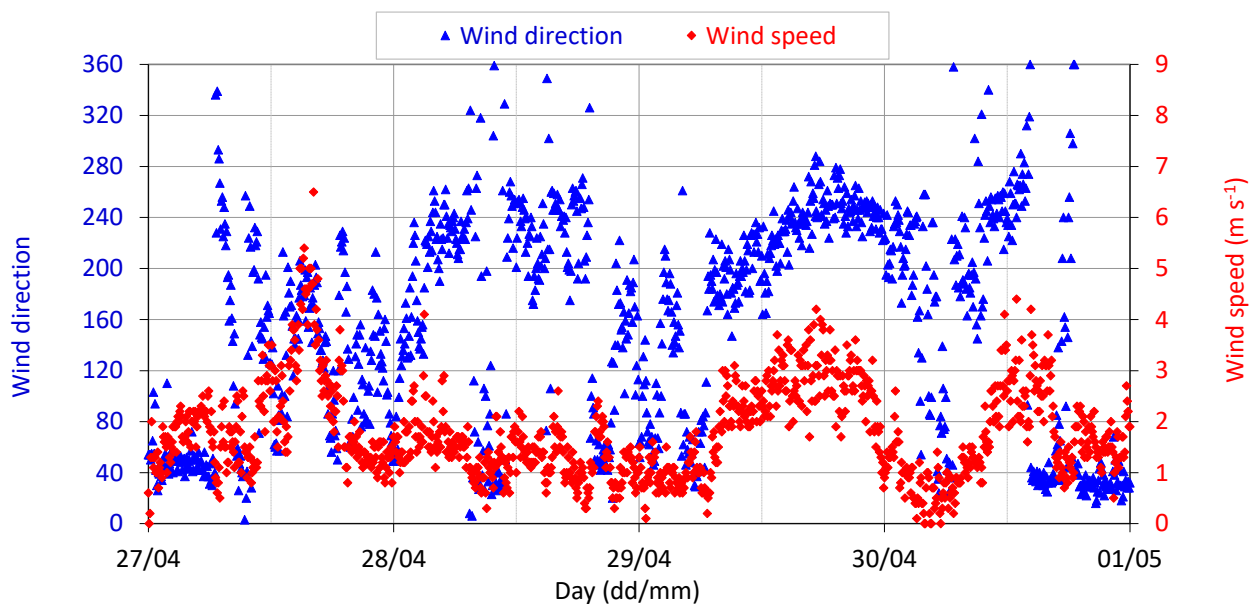

**Figure S5.** Temporal trend of wind speed and wind direction in downtown Rome on 27th April - 01st May 2009.

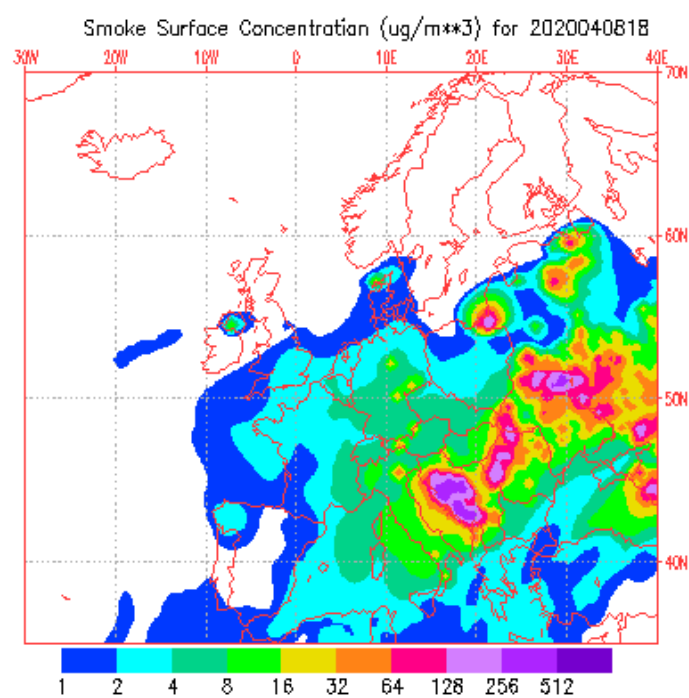

**Figure S6.** NAAPS smoke surface concentration on 08th April 2020 at 18.00 UTC.

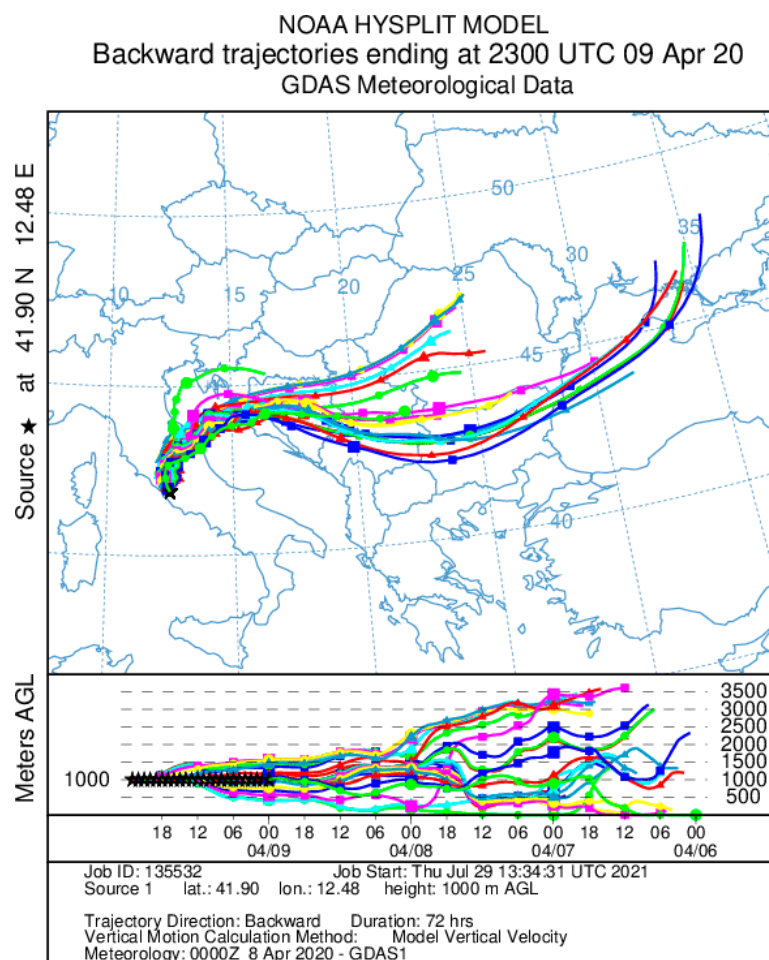

**Figure S7.** NOAA HYSPLIT 72 h backward air trajectories passing over Rome, 1000 above ground level, on 09th April 2020.
