# Supplementary material for: PM Dimensional Characterization in an Urban Mediterranean Area: Case Studies on the Separation between Fine and Coarse Atmospheric Aerosol
Source: MDPI journal article supplement (doi:10.3390/atmos13020227), 2022-01-29
Supplement: s1 [file s1]

Archive with 1 entries (1 files):
- atmosphere-1555665-supplementary.pdf
